# Supplementary material for: Excellent Infrared Nonlinear Optical Crystals BaMO(IO3)5 (M = V, Ta) Predicted by First Principle Calculations
Source: MDPI journal article supplement (doi:10.3390/ma11101809), 2018-09-24
Supplement: s1 [file s1]

Supporting information

# Excellent Infrared Nonlinear Optical Crystals $\text{BaMO}(\text{IO}_3)_5$ ( $\text{M} = \text{V}, \text{Ta}$ ) Predicted by First Principle Calculations

Yingfeng Li <sup>1,\*</sup>, Mengqi Cui <sup>1,2,†</sup>, Hejin Yan <sup>1</sup>, Yang-Xin Yu <sup>2,3,\*</sup>, Meicheng Li <sup>1</sup>, Xiang Li <sup>1</sup>, Lihua Chu <sup>1</sup>, Bing Jiang <sup>1</sup> and Mingde Qin <sup>4</sup>

<sup>1</sup> State Key Laboratory of Alternate Electrical Power System with Renewable Energy Sources, School of Renewable Energy, North China Electric Power University, Beijing 102206, China; cmqroy@126.com (M.C.); li-bluesky@hotmail.com (H.Y.); mcli@ncepu.edu.cn (M.L.); 13051314181@163.com (X.L.); 51102229@ncepu.edu.cn (L.C.); mucaoshan@163.com (B.J.)

<sup>2</sup> Laboratory of Chemical Engineering Thermodynamics, Department of Chemical Engineering, Tsinghua University, Beijing 100084, China

<sup>3</sup> State Key Laboratory of Chemical Engineering, Department of Chemical Engineering, Tsinghua University, Beijing 100084, China

<sup>4</sup> Program of Materials Science and Engineering, University of California, San Diego, CA 92093, USA; mingdeqin2@gmail.com

\* Correspondence: liyingfeng@ncepu.edu.cn (Y.L.); yangxyu@mail.tsinghua.edu.cn (Y.Y.); Tel.: +86-10-61772332 (Y.L.); +86-10-62782558 (Y.Y.)

† Contributed equally in this work

Received: 09 August 2018; Accepted: 18 September 2018; Published: date

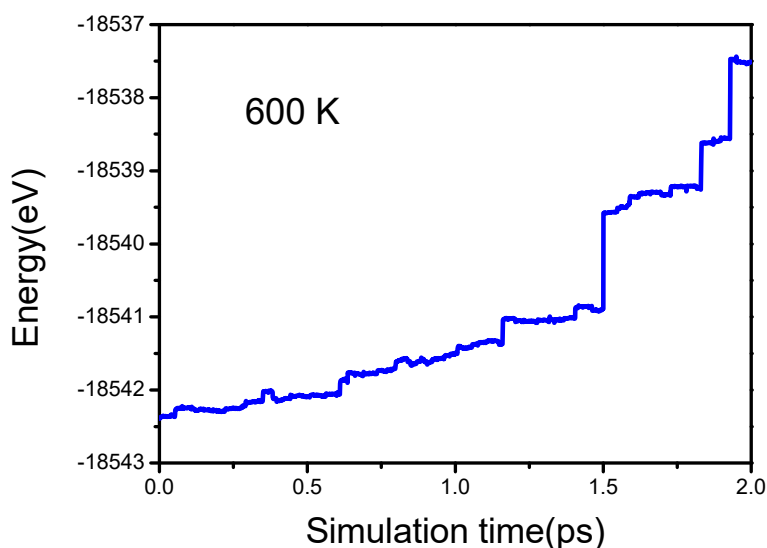

**Figure S1.** The energy evolution curves of the  $\text{BaTaO}(\text{IO}_3)_5$  at 600 K during the dynamics simulation.

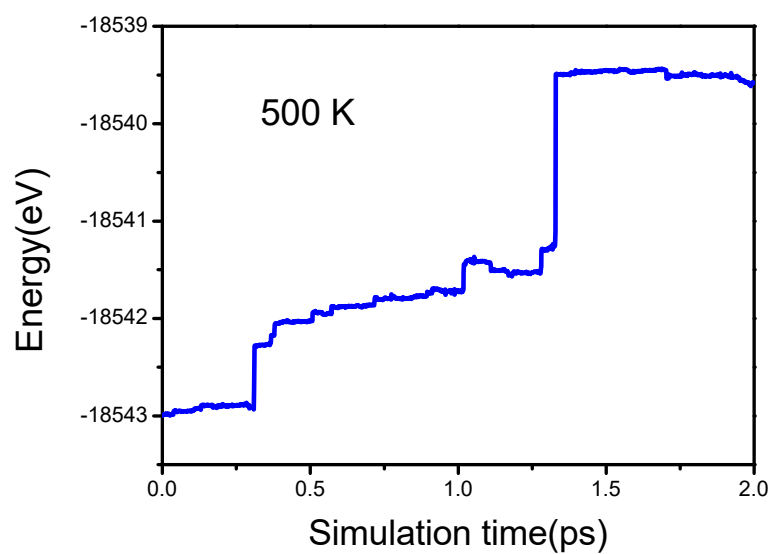

**Figure S2.** The energy evolution curves of the BaTaO(IO<sub>3</sub>)<sub>5</sub> at 500 K during the dynamics simulation.

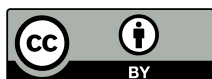

© 2018 by the authors. Submitted for possible open access publication under the terms and conditions of the Creative Commons Attribution (CC BY) license (<http://creativecommons.org/licenses/by/4.0/>).
